CORRECTION

# Correction: Hybrid predictive coding: Inferring, fast and slow

The *PLOS Computational Biology* Staff

The first author's name is spelled incorrectly. The correct name is: Alexander Tschantz. The correct citation is: Tschantz A, Millidge B, Seth AK, Buckley CL (2023) Hybrid predictive coding: Inferring, fast and slow. *PLoS Comput Biol* 19(8): e1011280. <https://doi.org/10.1371/journal.pcbi.1011280>. The publishers apologize for the error.

## Reference

1. Tscshantz A, Millidge B, Seth AK, Buckley CL (2023) Hybrid predictive coding: Inferring, fast and slow. *PLoS Comput Biol* 19(8): e1011280. <https://doi.org/10.1371/journal.pcbi.1011280> PMID: 37531366

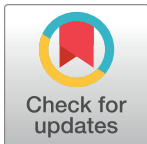

## OPEN ACCESS

**Citation:** The *PLOS Computational Biology* Staff (2023) Correction: Hybrid predictive coding: Inferring, fast and slow. *PLoS Comput Biol* 19(10): e1011601. <https://doi.org/10.1371/journal.pcbi.1011601>

**Published:** October 27, 2023

**Copyright:** © 2023 The PLOS Computational Biology Staff. This is an open access article distributed under the terms of the [Creative Commons Attribution License](https://creativecommons.org/licenses/by/4.0/), which permits unrestricted use, distribution, and reproduction in any medium, provided the original author and source are credited.
